# Supplementary material
Source: PubMed Central journal article supplement (PMC5995573)
Supplement: NIHMS890343-supplement.pdf [file NIHMS890343-supplement.pdf]

## **APPENDIX A - SUPPLEMENTAL FIGURES AND TABLES:**

### **Oleocanthal-rich extra virgin olive oil demonstrates acute anti-platelet effects in healthy men in a randomized trial**

Karan Agrawal <sup>a,b</sup>, Eleni Melliou <sup>c</sup>, Xueqi Li <sup>d</sup>, Theresa L. Pedersen <sup>e,1</sup>, Selina C. Wang <sup>d,f</sup>, Prokopios Magiatis <sup>c</sup>, John W. Newman <sup>a,b,e,\*</sup>, Roberta R. Holt <sup>a</sup>

<sup>a</sup> Department of Nutrition, University of California-Davis, One Shields Avenue, Davis, CA 95616, USA

<sup>b</sup> West Coast Metabolomics Center, Genome Center, 451 Health Sciences Drive, Davis, CA 95616, USA

<sup>c</sup> Department of Pharmacognosy and Natural Products Chemistry, Faculty of Pharmacy, National and Kapodistrian University of Athens, Panepistimioupolis Zografou 15 771, Athens, Greece

<sup>d</sup> UC Davis Olive Center, University of California-Davis, 392 Old Davis Road, Davis, CA 95616, USA

<sup>e</sup> Obesity and Metabolism Research Unit, USDA - Agricultural Research Service – Western Human Nutrition Research Center, 430 W Health Sciences Drive, Davis, CA 95616, USA

<sup>f</sup> Department of Food Science and Technology, University of California-Davis, One Shields Avenue, Davis, CA 95616, USA

\* *Corresponding author:* USDA-ARS-Western Human Nutrition Research Center, 430 W Health Sciences Drive, Davis, CA 95616, USA

*Email Address:* john.newman@ars.usda.gov

---

<sup>1</sup> Present Address: Advanced Analytics, 118 First Street, Woodland, CA 95695, USA.

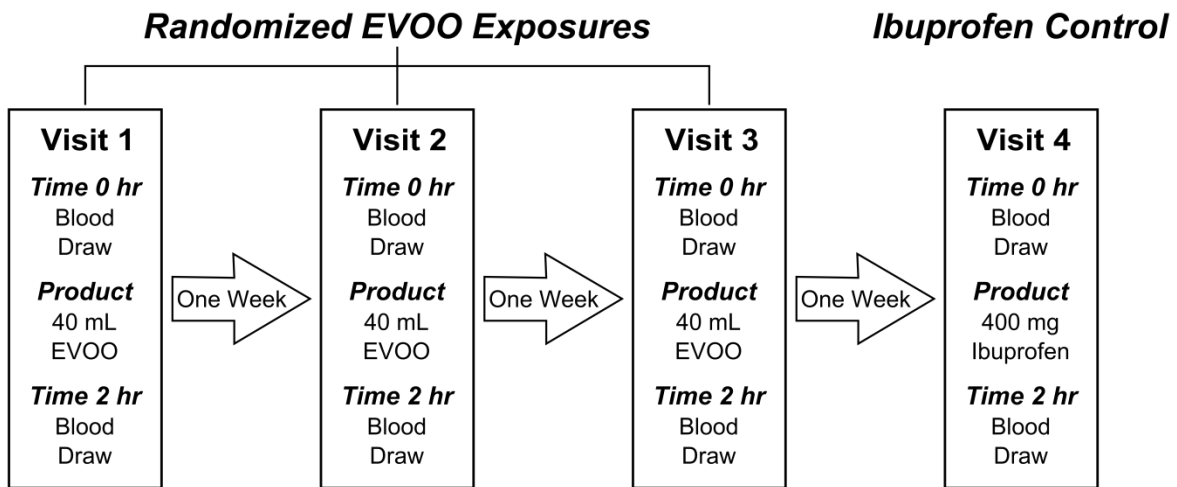

**Fig. A.1. Schematic of the blinded randomized controlled crossover study testing the acute effects of ingesting three unique EVOOs on platelet aggregation.** All EVOOs were matched in total phenols, but varied in their tyrosol, oleocanthal and oleacein content. Study participants ( $n = 9$ ) were healthy men, aged  $25 \pm 4$  yr with BMI of  $25.5 \pm 4.1$  kg/m<sup>2</sup>. Throughout the study, participants were asked to refrain from consuming olive products and non-steroidal anti-inflammatory drugs, and 24h before each study visit, participants were asked to maintain a low flavonoid diet. Plasma collected at each of the two timepoints was subjected to optical platelet aggregometry and oxylipin analysis.

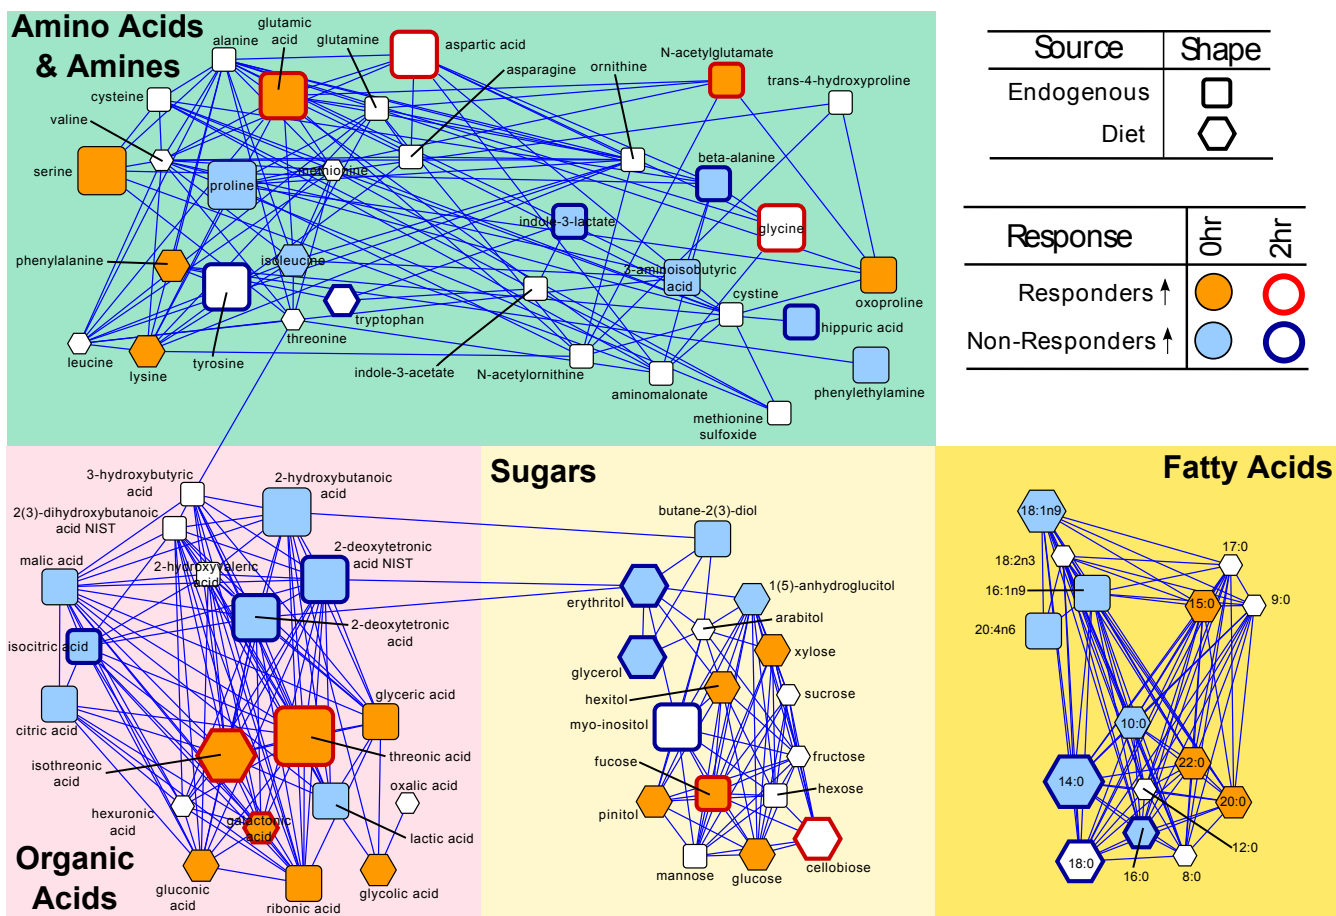

**Fig. A.2. Biochemical network map showing detected changes in metabolites associated with primary metabolism in subjects before and after EVOO consumption.** Metabolites are clustered and connected based on known biochemical pathways and structural similarity. Subjects that “responded” to EVOO intake had increased baseline and postprandial plasma concentrations of carbohydrates and sugar acids suggesting a diet rich in soy, fruits and vegetables. Subjects that did not “respond” to EVOO intake had increased baseline and postprandial plasma concentrations of non-esterified fatty acids (NEFA) and the citric acid cycle metabolites malic acid, isocitric acid and citric acid suggesting a diet rich in fats and oils. Increases in metabolites associated with “responders” were characterized by Variable Importance in Projection (VIP) scores  $> 1$  based on a Partial Least Squares-Discriminant Analysis (PLS-DA) of the metabolite data whereas increases in “non-responders” were characterized by VIP scores  $< -1$  in the same PLS-DA.

## Table A.1

**Table A.1**

Selected baseline characteristics of study participants assessed at the screening visit ( $n = 9$ ).

| Parameter                                            | Value          |
|------------------------------------------------------|----------------|
| Age (years)                                          | $26 \pm 4$     |
| BMI ( $\text{kg}/\text{m}^2$ )                       | $25.5 \pm 4.1$ |
| Blood Glucose (mg/dL)                                | $93 \pm 11$    |
| Cholesterol (mg/dL)                                  | $187 \pm 35$   |
| HDL (mg/dL)                                          | $52 \pm 18$    |
| LDL (mg/dL)                                          | $113 \pm 34$   |
| Triglycerides (mg/dL)                                | $117 \pm 59$   |
| White Blood Cell Count ( $\times 10^3/\text{mm}^3$ ) | $6 \pm 1.6$    |
| Red Blood Cell Count ( $\times 10^3/\text{mm}^3$ )   | $5 \pm 0.4$    |
| Platelet Count ( $\times 10^3/\text{mm}^3$ )         | $222 \pm 51$   |
| Mean Platelet Volume ( $\mu\text{m}^3$ )             | $9 \pm 1.4$    |

Data reported as mean  $\pm$  SD

**Table A.2****Table A.2**

Range-scaled changes in oxylipins screened for and detected in the 1 µg/mL collagen-stimulated plasma of subjects ( $n = 9$ ) following consumption of extra-virgin olive oils.

| Oxylipin        | Fatty Acid Precursor | Change in Concentration (nM) |                              |                              | P            |
|-----------------|----------------------|------------------------------|------------------------------|------------------------------|--------------|
|                 |                      | $D2_{i,0}$                   | $D2_{i,2}$                   | $D2_{i,0.5}$                 |              |
| <b>Alcohols</b> |                      |                              |                              |                              |              |
| 9-HODE          | C18:2n6              | 0.518 ± 0.593 <sup>A</sup>   | 0.00729 ± 0.375 <sup>B</sup> | 0.419 ± 0.482 <sup>A,B</sup> | <b>0.047</b> |
| 13-HODE         | C18:2n6              | 0.609 ± 0.606 <sup>A</sup>   | 0.0773 ± 0.272 <sup>B</sup>  | 0.478 ± 0.383 <sup>A</sup>   | <b>0.022</b> |
| 9-HOTE          | C18:3n3              | 0.635 ± 0.633 <sup>A</sup>   | 0.00032 ± 0.144 <sup>B</sup> | 0.36 ± 0.369 <sup>A</sup>    | <b>0.008</b> |
| 13-HOTE         | C18:3n3              | 0.623 ± 0.628 <sup>A</sup>   | 0.0679 ± 0.114 <sup>B</sup>  | 0.401 ± 0.364 <sup>A</sup>   | <b>0.040</b> |
| 5-HETE          | C20:4n6              | 0.121 ± 0.37 <sup>A,B</sup>  | -0.188 ± 0.442 <sup>B</sup>  | 0.373 ± 0.605 <sup>A</sup>   | <b>0.046</b> |
| 8-HETE          | C20:4n6              | 0.181 ± 0.304                | -0.265 ± 0.542               | 0.35 ± 0.657                 | 0.13         |
| 9-HETE          | C20:4n6              | 0.0604 ± 0.605               | -0.125 ± 0.256               | 0.187 ± 0.514                | 0.3          |
| 11-HETE         | C20:4n6              | 0.0836 ± 0.452               | -0.29 ± 0.621                | 0.0951 ± 0.394               | 0.2          |
| 12-HETE         | C20:4n6              | 0.0673 ± 0.454               | -0.299 ± 0.592               | 0.00844 ± 0.312              | 0.3          |
| 15-HETE         | C20:4n6              | 0.0375 ± 0.498               | -0.288 ± 0.561               | 0.0886 ± 0.396               | 0.2          |
| 20-HETE         | C20:4n6              | ND                           | ND                           | ND                           |              |
| 5-HEPE          | C20:5n3              | 0.0479 ± 0.3                 | -0.0159 ± 0.408              | 0.351 ± 0.49                 | 0.2          |
| 9-HEPE          | C20:5n3              | -0.0725 ± 0.434              | -0.184 ± 0.434               | 0.147 ± 0.49                 | 0.3          |
| 12-HEPE         | C20:5n3              | 0.0302 ± 0.444               | -0.205 ± 0.594               | 0.0951 ± 0.37                | 0.4          |
| 15-HEPE         | C20:5n3              | 0.171 ± 0.426                | -0.225 ± 0.498               | 0.274 ± 0.457                | 0.09         |
| 4-HDoHE         | C22:6n3              | ND                           | ND                           | ND                           |              |
| 14-HDoHE        | C22:6n3              | 0.0411 ± 0.547               | -0.191 ± 0.735               | 0.158 ± 0.433                | 0.5          |
| 17-HDoHE        | C22:6n3              | -0.209 ± 0.585               | ND                           | ND                           |              |

Data points with unlike letters were significantly different at  $P < 0.05$  (repeated measures ANOVA). All values reported as mean ± SD. Bold text highlights p-values < 0.05

*Abbreviations:*  $D2_{i,0}$ , EVOO with undetectable oleocanthal and oleacein;  $D2_{i,2}$ , EVOO with 2:1 oleacein/oleocanthal;  $D2_{i,0.5}$ , EVOO with 1:2 oleacein/oleocanthal; ND, Not Detected.

<sup>a</sup> Analytes are evaluated on a semi-quantitative basis due to lack of authentic standards

<sup>b</sup> Concentrations calculated relative to concentrations of authentic 9,12,13-TriHOME standards

**Table A.2****Table A.2**

Range-scaled changes in oxylipins screened for and detected in the 1 µg/mL collagen-stimulated plasma of subjects ( $n = 9$ ) following consumption of extra-virgin olive oils.

| Oxylipin                 | Fatty Acid Precursor | Change in Concentration (nM) |                        |                          | <i>P</i> |
|--------------------------|----------------------|------------------------------|------------------------|--------------------------|----------|
|                          |                      | <i>D2<sub>i</sub>0</i>       | <i>D2<sub>i</sub>2</i> | <i>D2<sub>i</sub>0.5</i> |          |
| <b>Diols</b>             |                      |                              |                        |                          |          |
| 9,10-DiHHex <sup>a</sup> | C16:0                | ND                           | ND                     | ND                       |          |
| 9,10-e-DiHO              | C18:0                | 0.108 ± 0.459                | 0.00247 ± 0.593        | 0.282 ± 0.48             | 0.5      |
| 9,10-DiHOME              | C18:2n6              | 0.119 ± 0.489                | 0.0884 ± 0.474         | 0.0868 ± 0.67            | 1.0      |
| 12,13-DiHOME             | C18:2n6              | -0.112 ± 0.34                | -0.218 ± 0.45          | -0.053 ± 0.571           | 0.7      |
| 9,10-DiHODE              | C18:3n3              | 0.226 ± 0.582                | 0.0569 ± 0.451         | 0.0435 ± 0.658           | 0.6      |
| 12,13-DiHODE             | C18:3n3              | -0.0526 ± 0.673              | 0.113 ± 0.619          | 0.0655 ± 0.683           | 0.8      |
| 15,16-DiHODE             | C18:3n3              | -0.22 ± 0.423                | -0.181 ± 0.486         | -0.0504 ± 0.632          | 0.6      |
| 5,6-DiHETrE              | C20:4n6              | -0.0116 ± 0.462              | 0.054 ± 0.448          | 0.0804 ± 0.456           | 0.9      |
| 8,9-DiHETrE              | C20:4n6              | 0.238 ± 0.597                | 0.036 ± 0.538          | 0.273 ± 0.468            | 0.3      |
| 11,12-DiHETrE            | C20:4n6              | 0.353 ± 0.267                | 0.241 ± 0.578          | 0.288 ± 0.506            | 1.0      |
| 14,15-DiHETrE            | C20:4n6              | 0.346 ± 0.398                | 0.0663 ± 0.728         | 0.31 ± 0.417             | 0.6      |
| 5,15-DiHETE              | C20:5n3              | ND                           | ND                     | ND                       |          |
| 8,15-DiHETE              | C20:5n3              | ND                           | ND                     | ND                       |          |
| 14,15-DiHETE             | C20:5n3              | -0.0772 ± 0.493              | 0.0471 ± 0.476         | 0.104 ± 0.554            | 0.8      |
| 17,18-DiHETE             | C20:5n3              | 0.247 ± 0.301                | 0.145 ± 0.559          | 0.112 ± 0.447            | 0.8      |
| 19,20-DiHDoPA            | C22:6n3              | 0.165 ± 0.372                | 0.0573 ± 0.671         | 0.402 ± 0.389            | 0.14     |

Data points with unlike letters were significantly different at  $P < 0.05$  (repeated measures ANOVA). All values reported as mean ± SD. Bold text highlights p-values < 0.05

*Abbreviations:* D2<sub>i</sub>0, EVOO with undetectable oleocanthal and oleacein; D2<sub>i</sub>2, EVOO with 2:1 oleacein/oleocanthal; D2<sub>i</sub>0.5, EVOO with 1:2 oleacein/oleocanthal; ND, Not Detected.

<sup>a</sup> Analytes are evaluated on a semi-quantitative basis due to lack of authentic standards

<sup>b</sup> Concentrations calculated relative to concentrations of authentic 9,12,13-TriHOME standards

**Table A.2****Table A.2**

Range-scaled changes in oxylipins screened for and detected in the 1 µg/mL collagen-stimulated plasma of subjects ( $n = 9$ ) following consumption of extra-virgin olive oils.

| Oxylipin        | Fatty Acid Precursor | Change in Concentration (nM) |                        |                          | <i>P</i> |
|-----------------|----------------------|------------------------------|------------------------|--------------------------|----------|
|                 |                      | <i>D2<sub>i</sub>0</i>       | <i>D2<sub>i</sub>2</i> | <i>D2<sub>i</sub>0.5</i> |          |
| <b>Epoxides</b> |                      |                              |                        |                          |          |
| 9,10-EpO        | C18:0                | 0.00691 ± 0.587              | -0.0836 ± 0.486        | 0.0671 ± 0.686           | 0.8      |
| 9,10-EpOME      | C18:2n6              | -0.0836 ± 0.571              | -0.302 ± 0.492         | 0.241 ± 0.428            | 0.07     |
| 12,13-EpOME     | C18:2n6              | -0.177 ± 0.464               | -0.204 ± 0.377         | 0.092 ± 0.519            | 0.2      |
| 9,10-EpODE      | C18:3n3              | ND                           | 0.00659 ± 0.811        | ND                       |          |
| 12,13-EpODE     | C18:3n3              | 0.163 ± 0.717                | -0.171 ± 0.483         | ND                       |          |
| 15,16-EpODE     | C18:3n3              | -0.152 ± 0.503               | -0.0881 ± 0.627        | 0.0111 ± 0.518           | 0.9      |
| 8,9-EpETrE      | C20:4n6              | ND                           | ND                     | ND                       |          |
| 11,12-EpETrE    | C20:4n6              | -0.0993 ± 0.472              | -0.0856 ± 0.636        | 0.589 ± 0.436            | 0.2      |
| 14,15-EpETrE    | C20:4n6              | -0.154 ± 0.737               | ND                     | ND                       |          |
| 11,12-EpETE     | C20:5n3              | -0.441 ± 0.634               | -0.0221 ± 0.669        | 0.248 ± 0.489            | 0.08     |
| 14,15-EpETE     | C20:5n3              | ND                           | ND                     | 0.347 ± 0.509            |          |
| 17,18-EpETE     | C20:5n3              | ND                           | ND                     | ND                       |          |
| 16,17-EpDPE     | C22:6n3              | 0.164 ± 0.298                | 0.0547 ± 0.644         | -0.015 ± 0.55            | 0.6      |
| 19,20-EpDPE     | C22:6n3              | 0.0411 ± 0.783               | 0.197 ± 0.679          | 0.302 ± 0.575            | 0.8      |

Data points with unlike letters were significantly different at  $P < 0.05$  (repeated measures ANOVA). All values reported as mean ± SD. Bold text highlights p-values < 0.05

*Abbreviations:* D2<sub>i</sub>0, EVOO with undetectable oleocanthal and oleacein; D2<sub>i</sub>2, EVOO with 2:1 oleacein/oleocanthal; D2<sub>i</sub>0.5, EVOO with 1:2 oleacein/oleocanthal; ND, Not Detected.

<sup>a</sup> Analytes are evaluated on a semi-quantitative basis due to lack of authentic standards

<sup>b</sup> Concentrations calculated relative to concentrations of authentic 9,12,13-TriHOME standards

**Table A.2****Table A.2**

Range-scaled changes in oxylipins screened for and detected in the 1 µg/mL collagen-stimulated plasma of subjects ( $n = 9$ ) following consumption of extra-virgin olive oils.

| Oxylipin              | Fatty Acid Precursor | Change in Concentration (nM) |                              |                           | P            |
|-----------------------|----------------------|------------------------------|------------------------------|---------------------------|--------------|
|                       |                      | $D2_{i,0}$                   | $D2_{i,2}$                   | $D2_{i,0.5}$              |              |
| <b>Hydroperoxides</b> |                      |                              |                              |                           |              |
| 9-HpODE <sup>a</sup>  | C18:2n6              | -0.128 ± 0.464               | 0.000982 ± 0.75              | -0.112 ± 0.672            | 0.9          |
| 13-HpODE <sup>a</sup> | C18:2n6              | -0.192 ± 0.561               | -0.304 ± 0.541               | ND                        | 0.6          |
| 5-HpETE <sup>a</sup>  | C20:4n6              | -0.18 ± 0.677                | 0.138 ± 0.534                | 0.0967 ± 0.556            | 0.6          |
| 12-HpETE <sup>a</sup> | C20:4n6              | ND                           | 0.0174 ± 0.692               | ND                        |              |
| 15-HpETE <sup>a</sup> | C20:4n6              | ND                           | 0.187 ± 0.755                | 0.00272 ± 0.601           | 0.9          |
| <b>Ketones</b>        |                      |                              |                              |                           |              |
| 9-KODE                | C18:2n6              | 0.189 ± 0.512                | -0.0275 ± 0.302              | 0.431 ± 0.38              | 0.10         |
| 13-KODE               | C18:2n6              | 0.363 ± 0.388 <sup>A</sup>   | 0.220 ± 0.292 <sup>A,B</sup> | 0.742 ± 0.27 <sup>C</sup> | <b>0.044</b> |
| 12,13-Ep-9-KODE       | C18:3n3              | ND                           | ND                           | ND                        |              |
| 5-KETE                | C20:4n6              | ND                           | ND                           | ND                        |              |
| 15-KETE               | C20:4n6              | 0.161 ± 0.399                | -0.15 ± 0.561                | -0.033 ± 0.689            | 0.2          |
| <b>Leukotrienes</b>   |                      |                              |                              |                           |              |
| 6-trans-LTB4          | C20:4n6              | ND                           | ND                           | ND                        |              |
| LTB4                  | C20:4n6              | ND                           | ND                           | ND                        |              |
| LTB5                  | C20:5n3              | ND                           | ND                           | ND                        |              |
| <b>Nitrolipids</b>    |                      |                              |                              |                           |              |
| 9-Nitrooleate         | C18:1n9              | ND                           | ND                           | ND                        |              |
| 10-Nitrooleate        | C18:1n9              | -0.0246 ± 0.788              | 0.232 ± 0.452                | 0.412 ± 0.419             | 0.5          |
| 10-Nitrolinoleate     | C18:2n6              | 0.00386 ± 0.563              | -0.462 ± 0.441               | ND                        |              |

Data points with unlike letters were significantly different at  $P < 0.05$  (repeated measures ANOVA). All values reported as mean ± SD. Bold text highlights p-values < 0.05

*Abbreviations:* D2<sub>i,0</sub>, EVOO with undetectable oleocanthal and oleacein; D2<sub>i,2</sub>, EVOO with 2:1 oleacein/oleocanthal; D2<sub>i,0.5</sub>, EVOO with 1:2 oleacein/oleocanthal; ND, Not Detected.

<sup>a</sup> Analytes are evaluated on a semi-quantitative basis due to lack of authentic standards

<sup>b</sup> Concentrations calculated relative to concentrations of authentic 9,12,13-TriHOME standards



**Table A.2****Table A.2**

Range-scaled changes in oxylipins screened for and detected in the 1 µg/mL collagen-stimulated plasma of subjects ( $n = 9$ ) following consumption of extra-virgin olive oils.

| Oxylipin                  | Fatty Acid Precursor | Change in Concentration (nM) |                             |                            | P            |
|---------------------------|----------------------|------------------------------|-----------------------------|----------------------------|--------------|
|                           |                      | $D2_{i0}$                    | $D2_{i2}$                   | $D2_{i0.5}$                |              |
| <b>Prostanoids</b>        |                      |                              |                             |                            |              |
| PGE1                      | C20:3n6              | ND                           | ND                          | ND                         |              |
| PGD2                      | C20:4n6              | ND                           | ND                          | ND                         |              |
| PGE2                      | C20:4n6              | 0.0769 ± 0.498               | -0.231 ± 0.574              | 0.17 ± 0.44                | 0.2          |
| 15-keto PGE2              | C20:4n6              | ND                           | ND                          | ND                         |              |
| 6-keto PGF1a              | C20:4n6              | 0.171 ± 0.576                | 0.093 ± 0.772               | 0.338 ± 0.298              | 0.8          |
| PGF2a                     | C20:4n6              | 0.0941 ± 0.272               | -0.311 ± 0.56               | 0.133 ± 0.468              | 0.05         |
| 15-deoxy PGJ2             | C20:4n6              | 0.0297 ± 0.494               | -0.12 ± 0.587               | 0.305 ± 0.441              | 0.05         |
| TXB2                      | C20:4n6              | 0.0596 ± 0.457               | -0.308 ± 0.616              | 0.0718 ± 0.373             | 0.2          |
| PGE3                      | C20:5n3              | ND                           | ND                          | ND                         |              |
| PGF3a                     | C20:5n3              | ND                           | ND                          | ND                         |              |
| <b>Triols</b>             |                      |                              |                             |                            |              |
| Sum TriHOMEs <sup>b</sup> | C18:2n6              | 0.414 ± 0.518 <sup>A</sup>   | -0.021 ± 0.513 <sup>B</sup> | 0.560 ± 0.327 <sup>A</sup> | <b>0.020</b> |
| Lipoxin A4                | C20:4n6              | ND                           | ND                          | ND                         |              |
| Resolvin D1               | C20:4n6              | ND                           | ND                          | ND                         |              |

Data points with unlike letters were significantly different at  $P < 0.05$  (repeated measures ANOVA). All values reported as mean ± SD. Bold text highlights p-values < 0.05

*Abbreviations:*  $D2_{i0}$ , EVOO with undetectable oleocanthal and oleacein;  $D2_{i2}$ , EVOO with 2:1 oleacein/oleocanthal;  $D2_{i0.5}$ , EVOO with 1:2 oleacein/oleocanthal; ND, Not Detected.

<sup>a</sup> Analytes are evaluated on a semi-quantitative basis due to lack of authentic standards

<sup>b</sup> Concentrations calculated relative to concentrations of authentic 9,12,13-TriHOME standards
